# Supplementary material
Source: MDPI journal article supplement (https://www.mdpi.com/1999-4907/11/5/585)
Supplement: s1 [file s1]

## Supplementary Materials

Table S1. Report of p-values from testing for differences in sapling density and cumulative sapling biomass between gaps of different age categories (within the same light regime and gap size categories) and between gaps of different size categories (same light regime and gap age categories).

| <b>Sapling density:</b> |         |                                                                            |       |       |       |                      |       |       |       |
|-------------------------|---------|----------------------------------------------------------------------------|-------|-------|-------|----------------------|-------|-------|-------|
|                         |         | <b>Effect of gap age (New vs. Old)</b>                                     |       |       |       |                      |       |       |       |
| Gap size                |         | < 100 m <sup>2</sup>                                                       |       |       |       | ≥ 100 m <sup>2</sup> |       |       |       |
| Light regime            |         | LL                                                                         | LH    | HH    | HL    | LL                   | LH    | HH    | HL    |
|                         | p-value | 1.000                                                                      | 0.909 | 1.000 | 0.989 | 1.000                | 0.979 | 0.452 | 0.735 |
|                         |         | <b>Effect of gap size (&lt; 100 m<sup>2</sup> vs. ≥ 100 m<sup>2</sup>)</b> |       |       |       |                      |       |       |       |
| Gap age                 |         | New gaps                                                                   |       |       |       | Old gaps             |       |       |       |
| Light regime            |         | LL                                                                         | LH    | HH    | HL    | LL                   | LH    | HH    | HL    |
|                         | p-value | 0.191                                                                      | 0.828 | 0.318 | 0.999 | <b>0.022</b>         | 0.997 | 0.999 | 1.000 |

  

| <b>Cumulative sapling biomass:</b> |         |                                                                            |       |              |       |                      |       |              |       |
|------------------------------------|---------|----------------------------------------------------------------------------|-------|--------------|-------|----------------------|-------|--------------|-------|
|                                    |         | <b>Effect of gap age (New vs. Old)</b>                                     |       |              |       |                      |       |              |       |
| Gap size                           |         | < 100 m <sup>2</sup>                                                       |       |              |       | ≥ 100 m <sup>2</sup> |       |              |       |
| Light regime                       |         | LL                                                                         | LH    | HH           | HL    | LL                   | LH    | HH           | HL    |
|                                    | p-value | 0.756                                                                      | 0.987 | <b>0.029</b> | 0.915 | 0.978                | 0.456 | <b>0.037</b> | 0.748 |
|                                    |         | <b>Effect of gap size (&lt; 100 m<sup>2</sup> vs. ≥ 100 m<sup>2</sup>)</b> |       |              |       |                      |       |              |       |
| Gap age                            |         | New gaps                                                                   |       |              |       | Old gaps             |       |              |       |
| Light regime                       |         | LL                                                                         | LH    | HH           | HL    | LL                   | LH    | HH           | HL    |
|                                    | p-value | 0.342                                                                      | 9.896 | 1.000        | 0.880 | 0.295                | 0.165 | 0.999        | 0.363 |

Table S2. Report of p-values from testing for differences in mean shoot length growth between saplings of different initial height classes (within the same diffuse light and gap size categories) and between gaps of different size categories (within the same initial height and diffuse light class).

| <b>Shoot length growth:</b>                                                |                      |              |       |                      |       |               |
|----------------------------------------------------------------------------|----------------------|--------------|-------|----------------------|-------|---------------|
| <b>Effect of diffuse light class (Low vs. High)</b>                        |                      |              |       |                      |       |               |
| Gap size                                                                   | < 100 m <sup>2</sup> |              |       | ≥ 100 m <sup>2</sup> |       |               |
| Light regime                                                               | < 1.5                | < 3          | ≥ 3   | < 1.5                | < 3   | ≥ 3           |
| p-value                                                                    | 0.292                | 0.247        | 0.097 | 1.000                | 1.000 | <b>0.0002</b> |
| <b>Effect of gap size (&lt; 100 m<sup>2</sup> vs. ≥ 100 m<sup>2</sup>)</b> |                      |              |       |                      |       |               |
| Gap age                                                                    | Low dif.             |              |       | High dif.            |       |               |
| Light regime                                                               | < 1.5                | < 3          | ≥ 3   | < 1.5                | < 3   | ≥ 3           |
| p-value                                                                    | 0.155                | <b>0.025</b> | 0.870 | 0.999                | 0.993 | 0.691         |

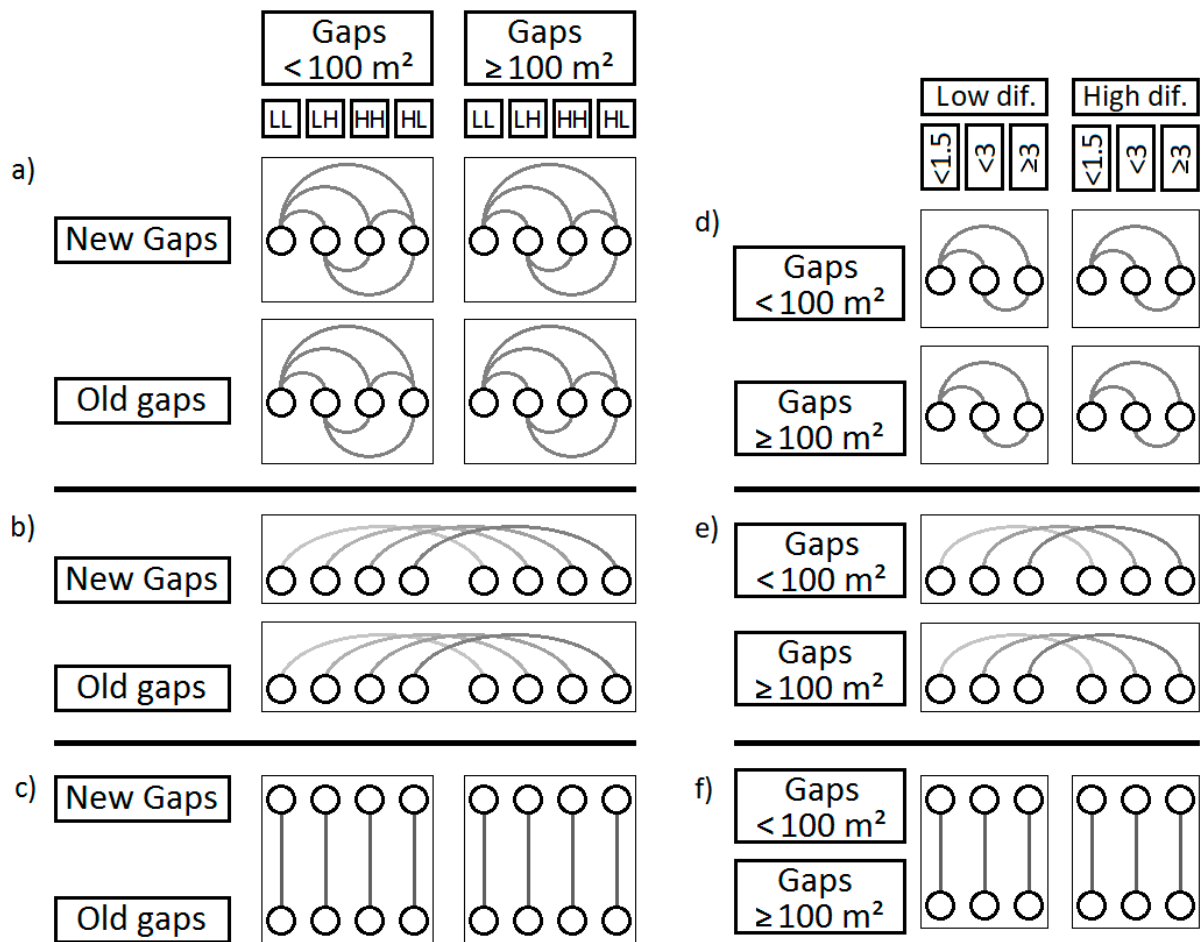

Figure S1. Scheme of the testing procedures (generalized linear hypothesis testing) for differences in sapling density and biomass (a-c) between a) the four light regime categories (LL, LH, HH, HL) in gaps of different size ( $< 100 \text{ m}^2$  and  $\geq 100 \text{ m}^2$ ) and age (new and old), b) gaps of different size categories (same light regime and gap age categories) and c) gaps of different age (within the same light regime and gap size categories). The testing groups for which the p-values were adjusted are outlined by a thin grey line. Squares without any regeneration were excluded from the analysis. The scheme on the left side explains the testing procedures (generalized linear hypothesis testing) for differences in shoot length growth (d-f). Here, it was tested for differences between d) saplings of different initial height classes (within the same diffuse light and gap size categories), e) different diffuse light categories (within the same initial height and gap size class) and f) gaps of different size categories (within the same initial height and diffuse light class).

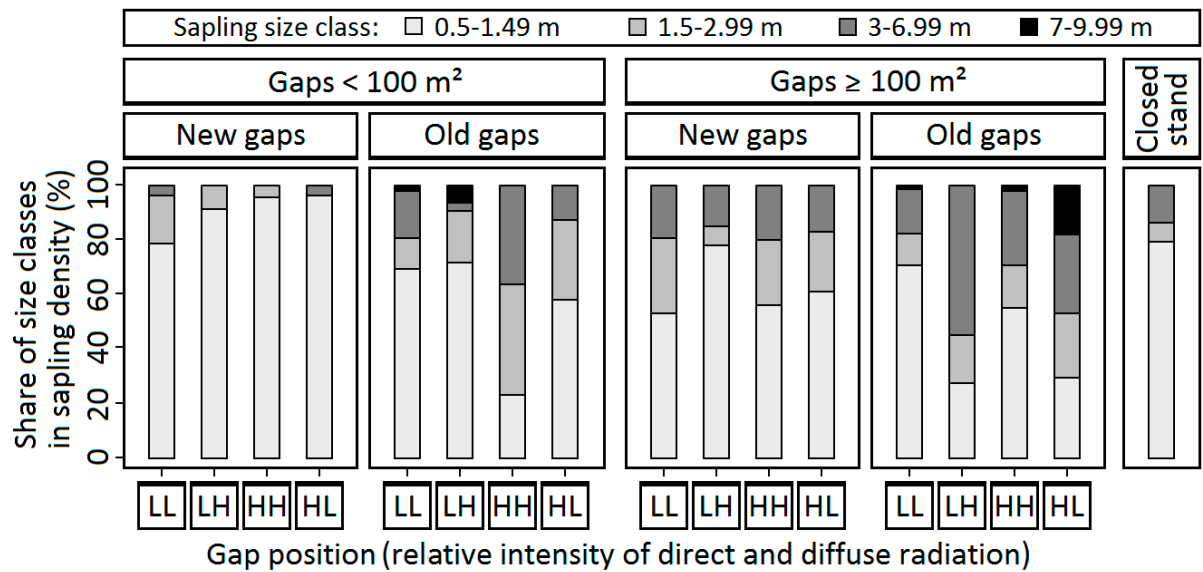

Figure. S2. Proportion of saplings of four height classes (light grey = 0.5–1.5 m, mid grey = 1.5–2.99 m, dark grey = 3–6.99 m, black  $\geq$  7 m) in squares of different relative light exposure (first letter for direct and second for diffuse radiation; high = H, low = L; see Table 2 and Figure 5) differentiated by gap size and gap age (before 2003: old; between 2003 and 2013: new). The proportions on closed-canopy plots are displayed at the right for comparison (32 belt transects  $\acute{a}$  13 m<sup>2</sup> area).
